# Supplementary material for: Derivation of Transgene‐Free Rat Induced Pluripotent Stem Cells Approximating the Quality of Embryonic Stem Cells
Source: PubMed Central journal article supplement (PMC5442795; doi:10.5966/sctm.2015-0390), 2016-09-13
Supplement: SCT3-6-340-s001.pdf [file SCT3-6-340-s001.pdf]

**Supporting Information Table S1 Rat embryonic stem cell derivation efficiency**

---

| Culture medium | No. of embryos | Established lines | Efficiency (%) |
|----------------|----------------|-------------------|----------------|
| 2i medium      | 10             | 2                 | 20             |
| 3i medium      | 25             | 15                | 60             |

---

---

**Supporting Information Table S2 List of reprogramming vectors used in this study**

---

Vectors      Combination of transcription factors

---

pMaster3    *hOCT4, hSOX2, hKLF4, hC-MYC, hNANOG, hLIN28, hNR5A2*

pMaster12   *hOCT4, hSOX2, hKLF4, hC-MYC, hNANOG, hLIN28, hNR5A2, hMIR302/367*

pMaster22   *hOCT4, hSOX2, hKLF4, hC-MYC, hNANOG, hLIN28, hNR5A2, rat mir302/367*

---

**Supporting Information Table S3 Reprogramming efficiencies of each vector**

---

| Vector    | Culture condition            | Reprogramming efficiency |
|-----------|------------------------------|--------------------------|
| pMaster3  | Normoxia                     | 0                        |
| pMaster3  | Hypoxia (5% O <sub>2</sub> ) | ~0.0004%                 |
| pMaster12 | Normoxia                     | ~0.001%                  |
| pMaster12 | Hypoxia (5% O <sub>2</sub> ) | ~0.01%                   |
| pMaster22 | Normoxia                     | ~0.002%                  |
| pMaster22 | Hypoxia (5% O <sub>2</sub> ) | ~0.02%                   |

---

**Supporting Information Table S4 Rat iPS cells establishment efficiency**

| Experiment No. | Induction vector | Passage of REFs* | Culture medium | Picked colonies | Established lines | Culture condition | Establishment Efficiency (%) |
|----------------|------------------|------------------|----------------|-----------------|-------------------|-------------------|------------------------------|
| LSP-12         | pMaster12        | P5**             | 2i/Lif         | 25              | 15                | Hypoxia           | 52                           |
| LSP-13         | pMaster22        | P5               | 2i/Lif         | 32              | 13                | Hypoxia           | 41                           |
| LSP-17         | pMaster12        | P1               | 2i/Lif         | 8               | 6                 | Hypoxia           | 75                           |
| LSP-18         | pMaster22        | P1               | 2i/Lif         | 8               | 5                 | Hypoxia           | 62.5                         |
| LSP-19         | pMaster3         | P1               | 2i/Lif         | 8               | 4                 | Hypoxia           | 50                           |
| LSP-20         | pMaster12        | P1               | 2i/Lif         | 0               | 0                 | Normoxia          | 0                            |
| LSP-22         | pMaster12        | P1               | 3i/Lif         | 12              | 2                 | Normoxia          | 17                           |
| LSP-23         | pMaster22        | P1               | 3i/Lif         | 12              | 2                 | Normoxia          | 17                           |
| LSP-24         | pMaster12        | P1               | 3i/Lif         | 48              | 37                | Hypoxia           | 77.1                         |
| LSP-28         | pMaster22        | P1               | 3i/Lif         | 8               | 5                 | Hypoxia           | 62.5                         |

\*REFs = rat embryonic fibroblasts

\*\*P5 means passage 5

**Supporting Information Table S5 PCR analysis results of rat iPS cells**

| Cell line   | Culture medium | Reprogramming vector | Culture condition | Transgene-fre<br>e |
|-------------|----------------|----------------------|-------------------|--------------------|
| LSP-12-10-1 | 2i             | pMaster12            | Hypoxia (5% O2)   | N                  |
| LSP-12-10-2 | 2i             | pMaster12            | Hypoxia (5% O2)   | N                  |
| LSP-12-11-1 | 2i             | pMaster12            | Hypoxia (5% O2)   | Y                  |
| LSP-12-11-3 | 2i             | pMaster12            | Hypoxia (5% O2)   | Y                  |
| LSP-12-11-5 | 2i             | pMaster12            | Hypoxia (5% O2)   | Y                  |
| LSP-12-11-6 | 2i             | pMaster12            | Hypoxia (5% O2)   | N                  |
| LSP-12-12-1 | 2i             | pMaster12            | Hypoxia (5% O2)   | Y                  |
| LSP-12-12-2 | 2i             | pMaster12            | Hypoxia (5% O2)   | N                  |
| LSP-12-12-4 | 2i             | pMaster12            | Hypoxia (5% O2)   | Y                  |
| LSP-12-12-5 | 2i             | pMaster12            | Hypoxia (5% O2)   | Y                  |
| LSP-12-12-6 | 2i             | pMaster12            | Hypoxia (5% O2)   | Y                  |
| LSP-12-1-3  | 2i             | pMaster12            | Hypoxia (5% O2)   | N                  |
| LSP-12-2-4  | 2i             | pMaster12            | Hypoxia (5% O2)   | N                  |
| LSP-12-2-5  | 2i             | pMaster12            | Hypoxia (5% O2)   | N                  |
| LSP-12-2-6  | 2i             | pMaster12            | Hypoxia (5% O2)   | Y                  |
| LSP-12-4-1  | 2i             | pMaster12            | Hypoxia (5% O2)   | N                  |
| LSP-12-4-2  | 2i             | pMaster12            | Hypoxia (5% O2)   | N                  |
| LSP-12-4-3  | 2i             | pMaster12            | Hypoxia (5% O2)   | N                  |
| LSP-12-5-1  | 2i             | pMaster12            | Hypoxia (5% O2)   | Y                  |

---

|             |    |           |                 |   |
|-------------|----|-----------|-----------------|---|
| LSP-12-5-2  | 2i | pMaster12 | Hypoxia (5% O2) | N |
| LSP-12-5-3  | 2i | pMaster12 | Hypoxia (5% O2) | Y |
| LSP-12-5-4  | 2i | pMaster12 | Hypoxia (5% O2) | N |
| LSP-12-5-5  | 2i | pMaster12 | Hypoxia (5% O2) | Y |
| LSP-12-6-1  | 2i | pMaster12 | Hypoxia (5% O2) | N |
| LSP-12-9-2  | 2i | pMaster12 | Hypoxia (5% O2) | Y |
| LSP-12-9-4  | 2i | pMaster12 | Hypoxia (5% O2) | N |
| LSP-12-9-6  | 2i | pMaster12 | Hypoxia (5% O2) | Y |
| LSP-13-13-4 | 2i | pMaster22 | Hypoxia (5% O2) | N |
| LSP-13-13-5 | 2i | pMaster22 | Hypoxia (5% O2) | Y |
| LSP-13-14-1 | 2i | pMaster22 | Hypoxia (5% O2) | Y |
| LSP-13-14-3 | 2i | pMaster22 | Hypoxia (5% O2) | N |
| LSP-13-16-2 | 2i | pMaster22 | Hypoxia (5% O2) | N |
| LSP-13-16-3 | 2i | pMaster22 | Hypoxia (5% O2) | N |
| LSP-13-7-1  | 2i | pMaster22 | Hypoxia (5% O2) | N |
| LSP-13-9-5  | 2i | pMaster22 | Hypoxia (5% O2) | Y |
| LSP-13-9-6  | 2i | pMaster22 | Hypoxia (5% O2) | Y |
| LSP-24-20-1 | 3i | pMaster12 | Hypoxia (5% O2) | Y |
| LSP-24-12   | 3i | pMaster12 | Hypoxia (5% O2) | N |
| LSP-24-20   | 3i | pMaster12 | Hypoxia (5% O2) | Y |
| LSP-24-19   | 3i | pMaster12 | Hypoxia (5% O2) | N |
| LSP-24-21   | 3i | pMaster12 | Hypoxia (5% O2) | Y |

---

---

|             |    |           |                 |   |
|-------------|----|-----------|-----------------|---|
| LSP-24-22   | 3i | pMaster12 | Hypoxia (5% O2) | Y |
| LSP-24-23   | 3i | pMaster12 | Hypoxia (5% O2) | Y |
| LSP-24-23-3 | 3i | pMaster12 | Hypoxia (5% O2) | Y |
| LSP-24-20-3 | 3i | pMaster12 | Hypoxia (5% O2) | Y |
| LSP-24-24   | 3i | pMaster12 | Hypoxia (5% O2) | Y |
| LSP-24-3    | 3i | pMaster12 | Hypoxia (5% O2) | N |
| LSP-25-5-2  | 3i | pMaster12 | Hypoxia (5% O2) | Y |
| LSP-27-2-1  | 3i | pMaster12 | Hypoxia (5% O2) | Y |
| LSP-26-2-1  | 3i | pMaster22 | Hypoxia (5% O2) | N |
| LSP-26-3-4  | 3i | pMaster22 | Hypoxia (5% O2) | Y |
| LSP-26-4-2  | 3i | pMaster22 | Hypoxia (5% O2) | N |
| LSP-26-6-2  | 3i | pMaster22 | Hypoxia (5% O2) | Y |
| LSP-28-1-2  | 3i | pMaster22 | Hypoxia (5% O2) | Y |

---

Y=Yes; N=No

**Supporting Information Table S6 List of differentially expressed genes in transgene-free rat iPS cells vs ES cells**

|                    | Gene_symbol | Base Mean  | log <sub>2</sub> (Fold<br>Change) | lfcSE  | stat    | p Value  | padj     |
|--------------------|-------------|------------|-----------------------------------|--------|---------|----------|----------|
| ENSRNOG00000047706 | RT1-CE16    | 34.5394    | -6.1057                           | 1.3237 | -4.6127 | 3.97E-06 | 0.0038   |
| ENSRNOG00000060849 | Rcor2       | 17.8088    | -5.2608                           | 1.0745 | -4.8959 | 9.79E-07 | 0.0014   |
| ENSRNOG00000007523 | Cct6b       | 46.8523    | -5.1359                           | 1.0149 | -5.0604 | 4.18E-07 | 0.0010   |
| ENSRNOG00000015401 | Mapk4       | 159.5972   | -2.1030                           | 0.4663 | -4.5100 | 6.48E-06 | 0.0050   |
| ENSRNOG00000003745 | Atf3        | 116.1880   | -1.9472                           | 0.4842 | -4.0214 | 5.78E-05 | 0.0206   |
| ENSRNOG00000020202 | Asrgl1      | 47.3198    | -1.7402                           | 0.3737 | -4.6568 | 3.21E-06 | 0.0034   |
| ENSRNOG00000048861 | LOC498122   | 122.4874   | -1.5498                           | 0.2792 | -5.5515 | 2.83E-08 | 9.11E-05 |
| ENSRNOG00000019802 | Zfp428      | 531.3881   | -1.3415                           | 0.3259 | -4.1158 | 3.86E-05 | 0.0174   |
| ENSRNOG00000004430 | Cep131      | 245.8407   | -1.1508                           | 0.2937 | -3.9179 | 8.93E-05 | 0.0248   |
| ENSRNOG00000001517 | Pdk1        | 430.8831   | -1.0696                           | 0.2203 | -4.8550 | 1.20E-06 | 0.0016   |
| ENSRNOG00000002373 | Akap1       | 966.6341   | 1.0321                            | 0.1724 | 5.9856  | 2.16E-09 | 1.16E-05 |
| ENSRNOG00000029971 | ND5         | 11490.0973 | 1.1299                            | 0.2902 | 3.8938  | 9.87E-05 | 0.0269   |
| ENSRNOG00000021056 | Kcnj14      | 88.0326    | 1.3264                            | 0.3033 | 4.3733  | 1.22E-05 | 0.0070   |
| ENSRNOG00000011879 | Nfat5       | 741.9896   | 1.3586                            | 0.3174 | 4.2808  | 1.86E-05 | 0.0103   |
| ENSRNOG00000019573 | Lcat        | 42.5623    | 1.3929                            | 0.3363 | 4.1415  | 3.45E-05 | 0.0163   |
| ENSRNOG00000030644 | ND1         | 16387.5236 | 1.4310                            | 0.2979 | 4.8029  | 1.56E-06 | 0.0019   |
| ENSRNOG00000024066 | Fundc2      | 134.4565   | 1.5605                            | 0.3440 | 4.5366  | 5.72E-06 | 0.0046   |
| ENSRNOG00000001271 | Card6       | 139.2871   | 1.8049                            | 0.3110 | 5.8033  | 6.50E-09 | 2.62E-05 |



---

|                    |            |           |        |        |        |          |          |
|--------------------|------------|-----------|--------|--------|--------|----------|----------|
| ENSRNOG00000020585 | Tbxa2r     | 51.6061   | 2.3676 | 0.5643 | 4.1957 | 2.72E-05 | 0.0137   |
| ENSRNOG00000029427 | Grhl3      | 120.2871  | 2.4612 | 0.6266 | 3.9281 | 8.56E-05 | 0.0242   |
| ENSRNOG00000014427 | Chrn4      | 25.6065   | 2.6140 | 0.5870 | 4.4533 | 8.46E-06 | 0.0061   |
| ENSRNOG00000006653 | Slc38a4    | 602.4645  | 2.7891 | 0.4284 | 6.5112 | 7.46E-11 | 6.00E-07 |
| ENSRNOG00000014761 | Rasd2      | 23.9922   | 2.7897 | 0.7194 | 3.8779 | 0.0001   | 0.0283   |
| ENSRNOG00000013027 | Rgl3       | 25.6125   | 2.8101 | 0.7434 | 3.7799 | 0.0002   | 0.0377   |
| ENSRNOG00000009620 | Cybrd1     | 112.9714  | 2.9425 | 0.7267 | 4.0492 | 5.14E-05 | 0.0197   |
| ENSRNOG00000005277 | Ptpv       | 213.7536  | 2.9958 | 0.6445 | 4.6480 | 3.35E-06 | 0.0034   |
| ENSRNOG00000013835 | Timm8a2    | 15.0403   | 2.9987 | 0.7626 | 3.9323 | 8.41E-05 | 0.0242   |
| ENSRNOG00000032231 | Mroh6      | 10.4090   | 3.1344 | 0.8285 | 3.7831 | 0.0002   | 0.0377   |
| ENSRNOG00000014683 | Il1r2      | 202.0463  | 3.1362 | 0.7148 | 4.3877 | 1.15E-05 | 0.0068   |
| ENSRNOG00000014504 | Il1r1      | 279.0232  | 3.2094 | 0.7554 | 4.2484 | 2.15E-05 | 0.0115   |
| ENSRNOG00000001414 | Serpine1   | 2721.5855 | 3.5571 | 0.8854 | 4.0175 | 5.88E-05 | 0.0206   |
| ENSRNOG00000001195 | Trpv4      | 12.5600   | 3.5756 | 0.9582 | 3.7314 | 0.0002   | 0.0436   |
| ENSRNOG00000054438 | LOC292543  | 109.6941  | 3.6031 | 0.4471 | 8.0593 | 7.68E-16 | 1.24E-11 |
| ENSRNOG00000005572 | RGD1306782 | 69.9785   | 3.6059 | 0.7254 | 4.9706 | 6.68E-07 | 0.0011   |
| ENSRNOG00000013291 | Cyp2c23    | 7.3644    | 3.7179 | 0.9971 | 3.7288 | 0.0002   | 0.0436   |
| ENSRNOG00000014361 | Edn1       | 69.4878   | 3.8871 | 1.0346 | 3.7570 | 0.0002   | 0.0401   |
| ENSRNOG00000047367 | Card14     | 294.8559  | 3.9451 | 0.9889 | 3.9894 | 6.62E-05 | 0.0219   |
| ENSRNOG00000009118 | Pou2f3     | 6.6205    | 3.9772 | 0.9676 | 4.1106 | 3.95E-05 | 0.0174   |
| ENSRNOG00000016460 | Clu        | 1171.7083 | 3.9810 | 0.9384 | 4.2421 | 2.21E-05 | 0.0115   |
| ENSRNOG00000012347 | Gata2      | 51.4198   | 3.9997 | 0.9588 | 4.1715 | 3.03E-05 | 0.0148   |

---

|                    |         |          |        |        |        |          |        |
|--------------------|---------|----------|--------|--------|--------|----------|--------|
| ENSRNOG00000011800 | F3      | 495.6745 | 4.0093 | 0.9916 | 4.0432 | 5.27E-05 | 0.0197 |
| ENSRNOG00000028531 | Ccl25   | 27.1723  | 4.0680 | 0.8204 | 4.9583 | 7.11E-07 | 0.0011 |
| ENSRNOG00000021242 | Adam33  | 122.4006 | 4.2129 | 1.0578 | 3.9826 | 6.82E-05 | 0.0219 |
| ENSRNOG00000051548 | Lmod1   | 290.7254 | 4.2408 | 1.0737 | 3.9496 | 7.83E-05 | 0.0233 |
| ENSRNOG00000008697 | Nov     | 469.7524 | 4.2533 | 1.0785 | 3.9438 | 8.02E-05 | 0.0235 |
| ENSRNOG00000032240 | Gbp5    | 10.8610  | 4.3675 | 0.9855 | 4.4316 | 9.36E-06 | 0.0061 |
| ENSRNOG00000050040 | Akr1c12 | 23.2951  | 4.3796 | 1.1009 | 3.9782 | 6.94E-05 | 0.0219 |
| ENSRNOG00000033706 | Klk14   | 12.5645  | 4.4543 | 1.0988 | 4.0538 | 5.04E-05 | 0.0197 |
| ENSRNOG00000004400 | Avpr1a  | 176.1344 | 4.4982 | 1.1374 | 3.9547 | 7.66E-05 | 0.0233 |
| ENSRNOG00000019757 | Dpep3   | 7.3221   | 4.9564 | 1.1157 | 4.4423 | 8.90E-06 | 0.0061 |
| ENSRNOG00000021345 | Timd2   | 9.3230   | 4.9851 | 1.2561 | 3.9686 | 7.23E-05 | 0.0224 |
| ENSRNOG00000012789 | Trhr2   | 29.8242  | 5.0345 | 1.0820 | 4.6529 | 3.27E-06 | 0.0034 |
| ENSRNOG00000019445 | Msln    | 24.2446  | 5.7523 | 1.3015 | 4.4197 | 9.88E-06 | 0.0061 |

Down-regulated in ES cells

Up-regulated in ES cells

**Supporting Information Table S7. *Leptin* gene targeting frequency in transgene-free rat iPS cells and ES cells**

|                  | Cell line | Target genes  | No. of candidate colonies | No. of targeted colonies | Targeting frequency |
|------------------|-----------|---------------|---------------------------|--------------------------|---------------------|
| <b>iPS cells</b> | LSP-24-24 | <i>Leptin</i> | 128                       | 24                       | 18.8%               |
| <b>ES cells</b>  | LSP-9-3   | <i>Leptin</i> | 18                        | 3                        | 16.6%               |

**Supporting Information Table S8. Primers used in this study**

| PCR amplified region | Primer Sequence (5'-3')                                              | Production length (bp) |
|----------------------|----------------------------------------------------------------------|------------------------|
| for q-PCR            |                                                                      |                        |
| <i>Oct4</i>          | F: AGCATACGAGTTCTGTGGAGGGA<br>R: GATGGTTGTCTGGCTGAACACCT             | 352                    |
| <i>Rex1</i>          | F: AAAAGGTGGCATATGACCGCAGT<br>R: AGTCCCTTTCAGCTCCTCTACCC             | 230                    |
| <i>Klf4</i>          | F: GGACCCAGTATAACATTCCGCCAC<br>R: AGTTCCTCGGGACTCAGTGTAGG            | 369                    |
| <i>Sox2</i>          | F: GGAGAACCCCAAGATGCACAACCT<br>R: TCCGGGAAGCGTGTACTTATCCT            | 205                    |
| <i>Eras</i>          | F: TCTTTGCTCTTGATGACCCGTCG<br>R: AAAGCTTCCTCTACACCTTGCCG             | 220                    |
| <i>Nanog</i>         | F: CCTACCTCTTCAAGATAGCCCTG<br>R: CCTTTGCCTCTGAAACCTATCCT             | 184                    |
| <i>Gapdh</i>         | F: TTGCCATCAACGACCCCTTCATT<br>R: ACGCCAGTAGACTCCACGACATA             | 211                    |
| for PCR              |                                                                      |                        |
| <i>neo-IRES 1</i>    | WS1384: ATGATGGATACTTTCTCGGCAGGA<br>WS1385: TGCCACGTTGTGAGTTGGATAGTT | 588                    |

|                    |                                   |     |
|--------------------|-----------------------------------|-----|
| <i>neo-IRES 2</i>  | WS1386:GGACAGGTCGGTCTTGACAAAAAG   | 569 |
|                    | WS1387: TCTGTTGAATGTCGTGAAGGAAGC  |     |
| <i>tk 1</i>        | WS1388: AATCCAGGATAAAGACGTGCATGG  | 701 |
|                    | WS1389: GACAATCGCGAACATCTACACCAC  |     |
| <i>tk 2</i>        | WS1390: ATACCGCACCGTATTGGCAAGTAG  | 506 |
|                    | WS1391: ACGTACCCGAGCCGATGACTTACT  |     |
| <i>MYC-SOX2 1</i>  | WS1392: GAAGTTCTCCTCCTCGTCGCAGTA  | 502 |
|                    | WS1393: CCTGCAGTACAACCTCCATGACCAG |     |
| <i>MYC-SOX2 2</i>  | WS1394: GTCGCAGATGAAACTCTGGTTCAC  | 616 |
|                    | WS1395: TGTGGTTACCTCTTCCTCCCACTC  |     |
| <i>SOX2-KLF4 1</i> | WS1396: TTCTCCGTCTCCGACAAAAGTTTC  | 536 |
|                    | WS1397: AAGAGTTCCCATCTCAAGGCACAC  |     |
| <i>SOX2-KLF4 2</i> | WS1398: CCTTCTTCATGAGCGTCTTGTTTT  | 545 |
|                    | WS1399: TGAAGTACCAGGCACTACCGTAA   |     |
| <i>KLF4-OCT4 1</i> | WS1400: GATCGTTGAACTCCTCGGTCTCTC  | 618 |
|                    | WS1401: ATGTGGTCCGAGTGTGGTTCTGTA  |     |
| <i>KLF4-OCT4 2</i> | WS1402: GGGTCAGCGAATTGGAGAGAATAA  | 612 |
|                    | WS1403: GATCAAGCAGCGACTATGCACAAC  |     |
| <i>oriP 1</i>      | WS1404: ATGGCTATGGGCAACACATAATCC  | 523 |
|                    | WS1405: CTCTCAGCGACCTCGTGAATATGA  |     |
| <i>oriP 2</i>      | WS1406: CACAAACCCCTTGGGCAATAAATA  | 500 |
|                    | WS1407: CCATTAGTGGTTTTGTGGGCAAGT  |     |

|                      |                                    |     |
|----------------------|------------------------------------|-----|
| EBNA 1               | WS1408: CCTCATCTCCATCACCTCCTTCAT   | 487 |
|                      | WS1409: TCCAACCCGAAATTTGAGAACATT   |     |
| EBNA 2               | WS1410: GGAAACCAGGGAGGCAAATCTACT   | 357 |
|                      | WS1411: TCACGTAGAAAGGACTACCGACGA   |     |
| <i>NANOG-LIN28</i> 1 | WS1416: AACCTTCCATGTGCAGCTTACTC    | 436 |
|                      | WS1417: CTGCTGGGGAAGGCCTTAATGTA    |     |
| <i>NANOG-LIN28</i> 2 | WS1418: CGCCTCTCACTCCCAATACAGAAT   | 442 |
|                      | WS1419: GAAGTGGCGTGAAACAGACTTTGA   |     |
| <i>NR5A2</i> 1       | WS1555: TGTCAATTTGGCAGTTCTGGTTTT   | 449 |
|                      | WS1556: AGGGGTTTTATGCGATGGAGTTTC   |     |
| <i>NR5A2</i> 2       | WS1557: GGACAACGCTTTCTCTGTGTTTTG   | 415 |
|                      | WS1558: CCAGCTTGGCACTTGATGTAATTC   |     |
| EF1a- <i>OCT4</i> 1  | WS1551: GCACTAGCCCCACTCCAACCT      | 445 |
|                      | WS1552: AGGGGTTTTATGCGATGGAGTTTC   |     |
| EF1a- <i>OCT4</i> 2  | WS1553: GAGTTGCTCTCCACCCCGACT      | 453 |
|                      | WS1554: CCAGCTTGGCACTTGATGTAATTC   |     |
| <i>miR 302/367</i>   | WS1645: TCTCCTACTTATTTCTCACCCCGATG | 317 |
|                      | WS1646: GGAAATCATGATCATCCCTTCTCCT  |     |
| pZT                  | F: GGATCTGTAGGGCGCAGTAG            | 317 |
|                      | R: AGACCCCTAGGAATGCTCGT            |     |

---

F: Forward;

R: Reverse

Figure S1

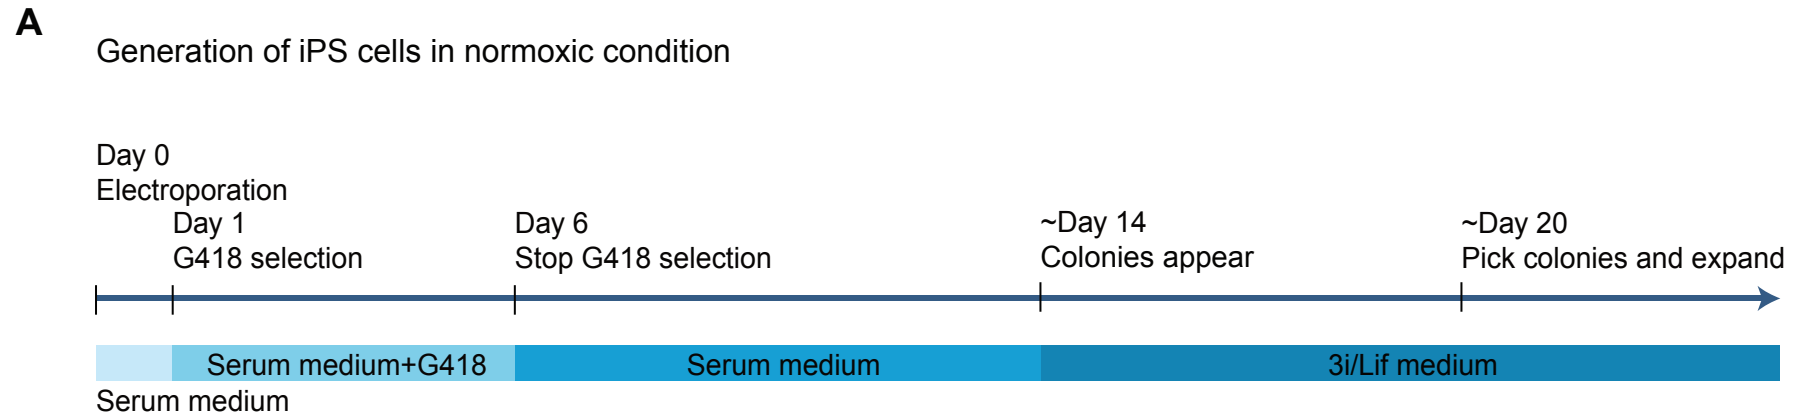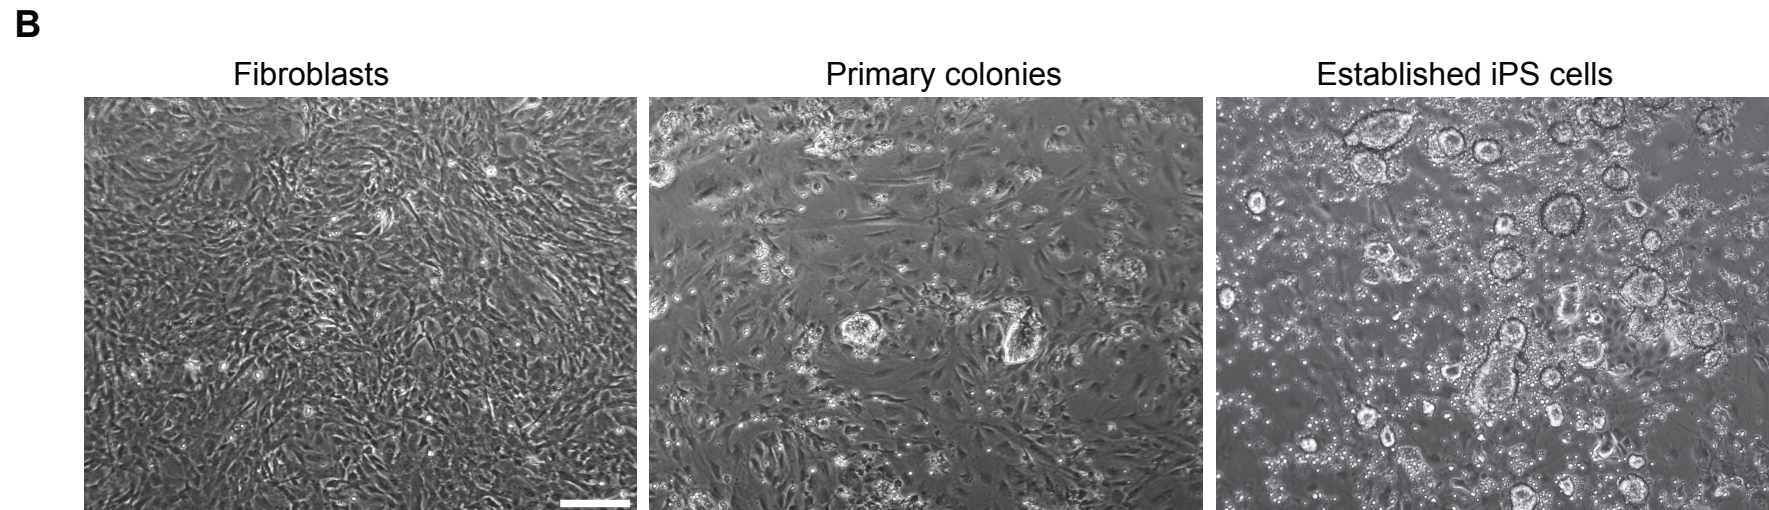

Figure S2

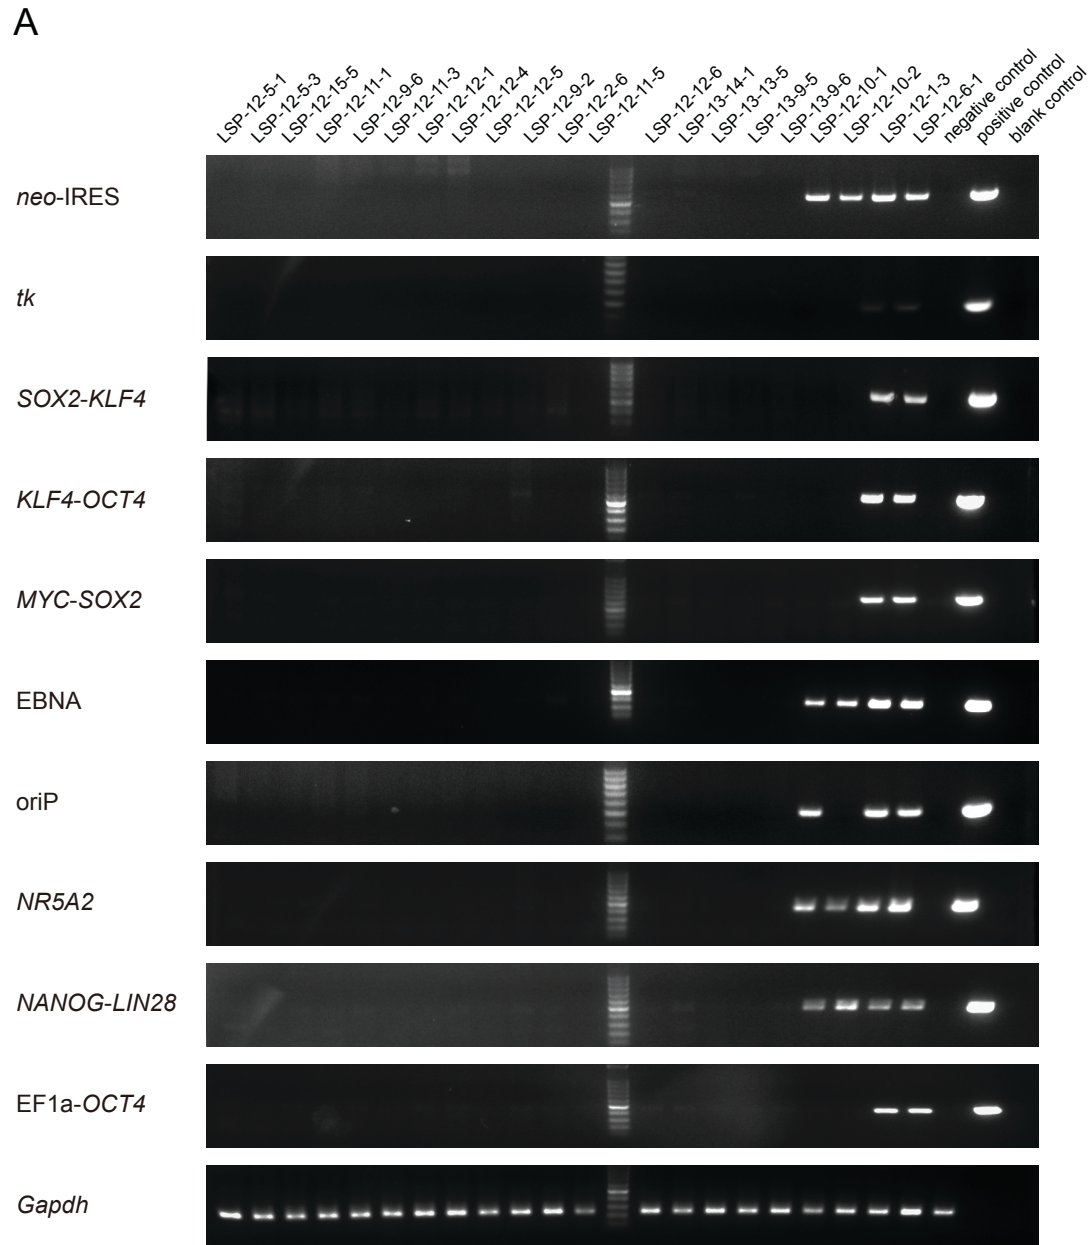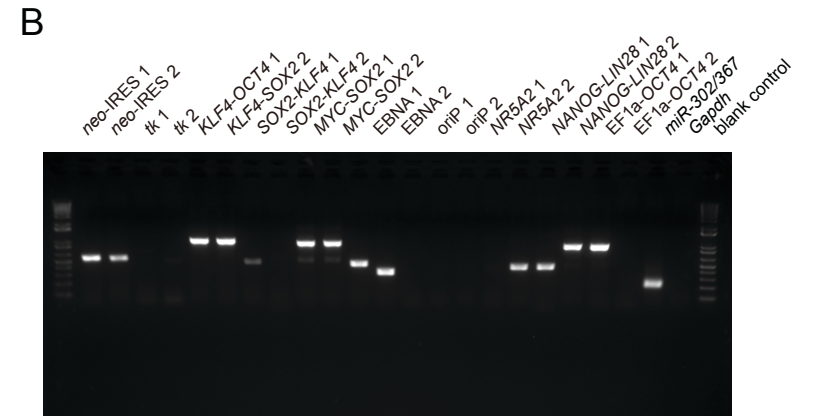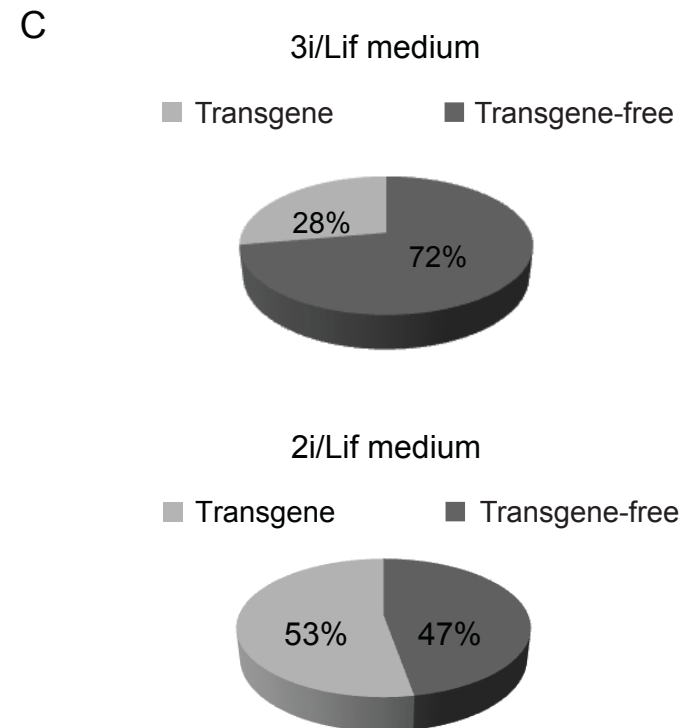



Figure S3

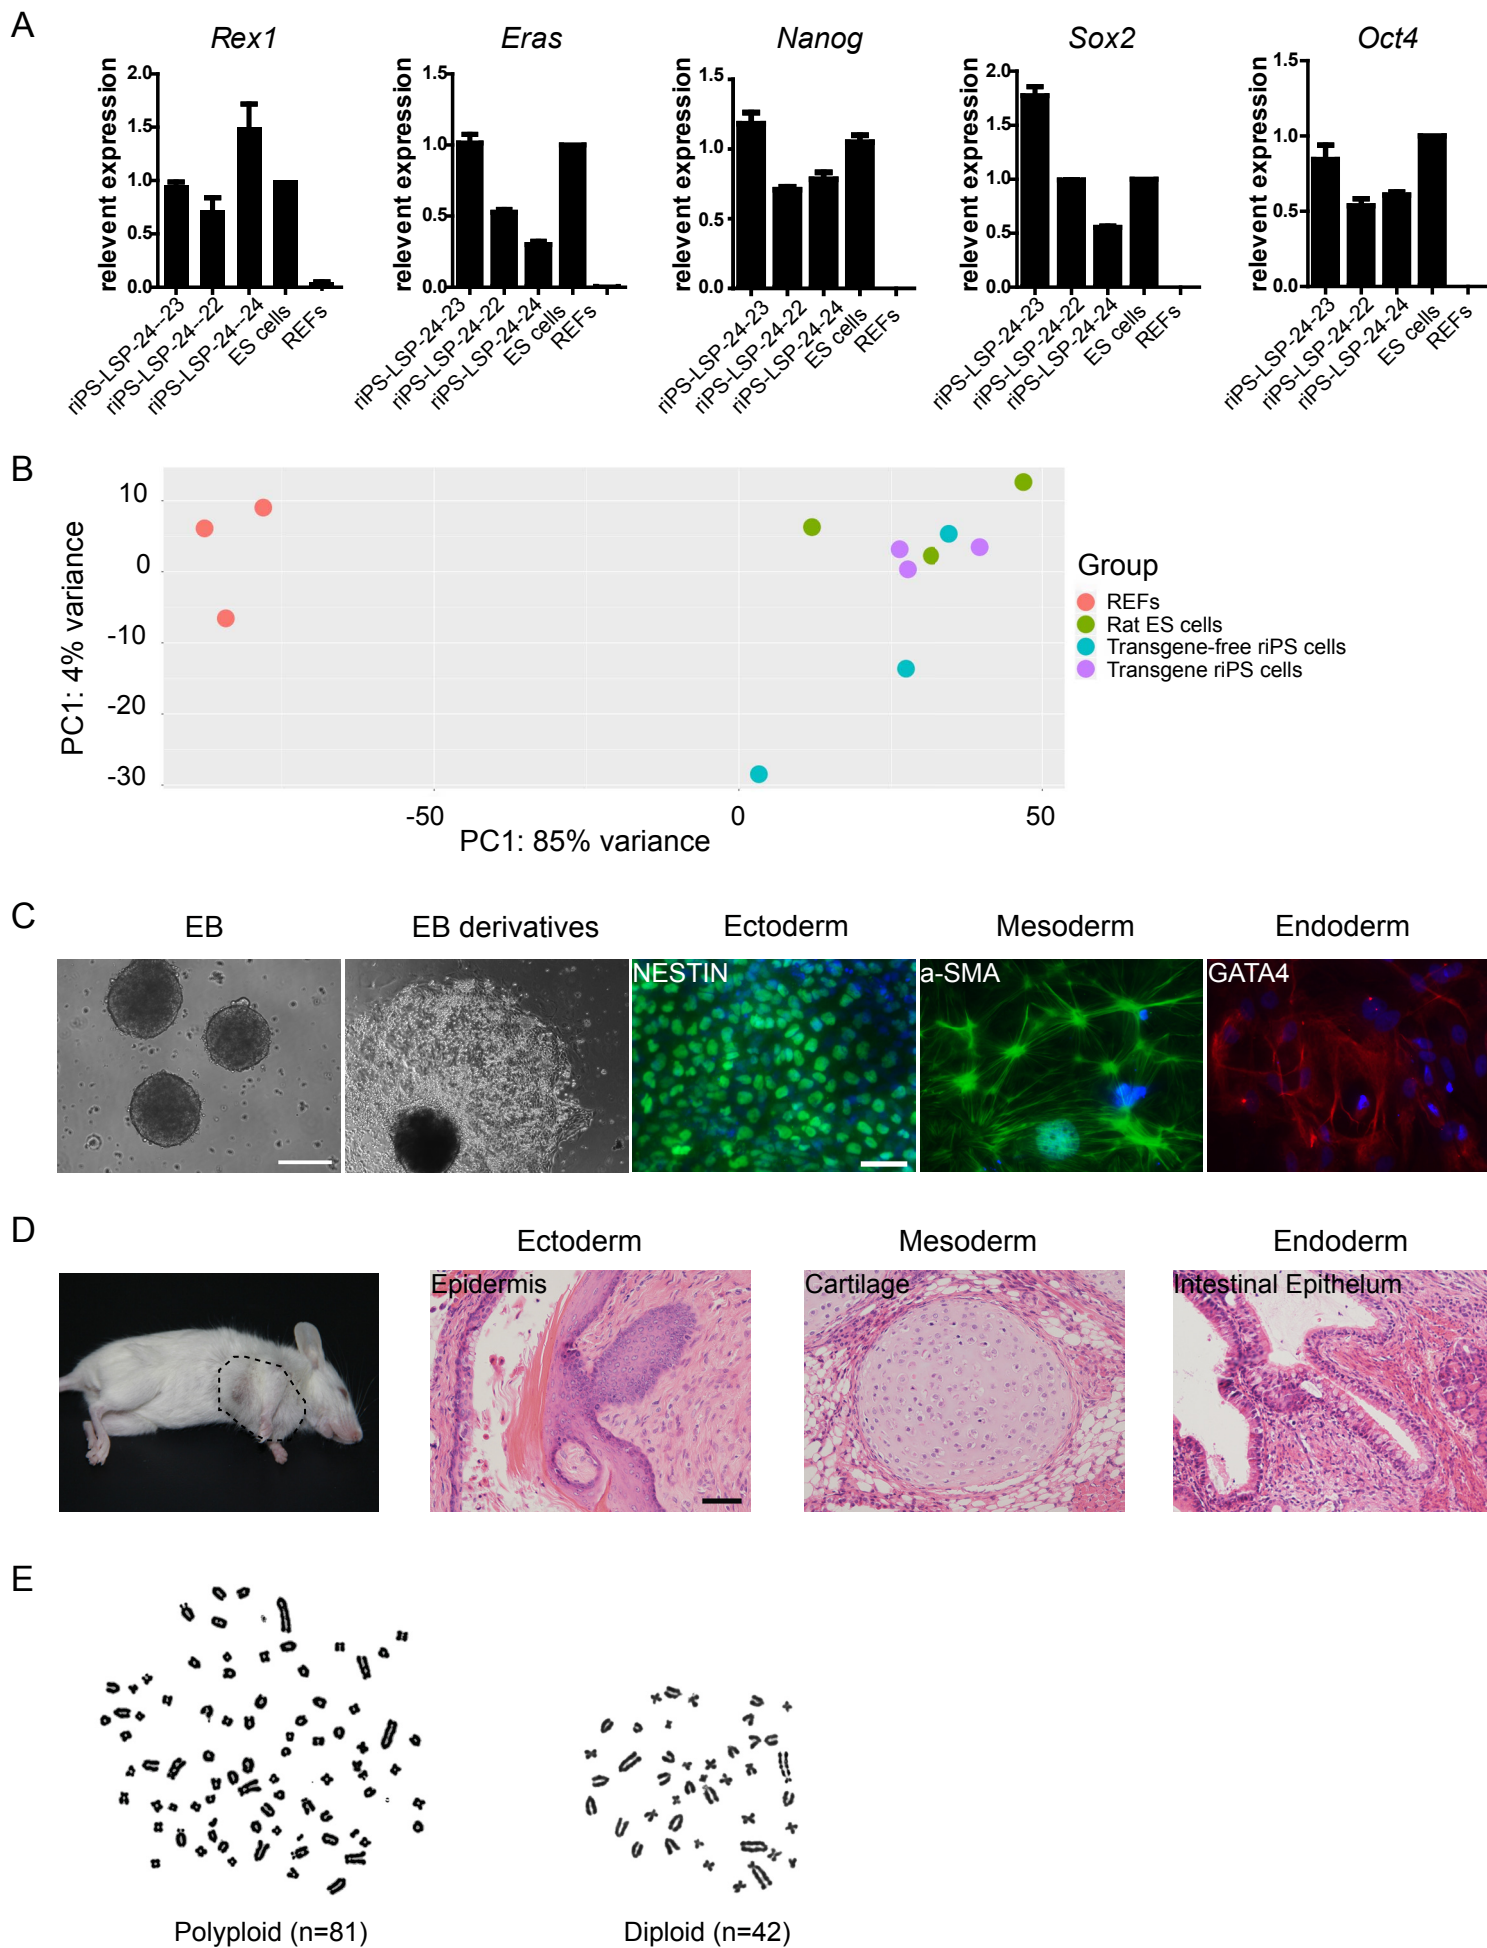

1 **Supplemental Figure Legends**

2 **Figure S1.** Reprogramming of REFs in normal condition. **(A):** Flow chart of iPS generation in  
3 normal condition. **(B):** Representative example of riPS cells in normal condition. The primary  
4 colonies tightly adhered to the culture dish and after subsequent passage, formed riPS cell  
5 without clear boundary to the feeder cells. Scale bar = 200 um.

6

7 **Figure S2.** PCR verification of transgene-free riPS cells. **(A):** PCR analysis of candidate riPS  
8 cells. Twenty-one riPS cell lines were analyzed by PCR with 10 pairs of primers covering the  
9 reprogramming vectors pMaster12 and pMaster22. Seventeen of them are completely  
10 transgene-free and the remaining 4 colonies still have residual exogenous gene sequences.  
11 Rat embryonic fibroblast (REF) genomic DNA was used as a negative control. Genomic DNA  
12 of nuclear transfected REFs was used as positive control. PCR without genomic template was  
13 used as blank control. **(B):** PCR analysis of riPS cell line LSP-24-3. We performed PCR with 21  
14 pairs of primers to detect vector fragments in the riPS cell line. The drug selection marker  
15 *neo* and transcription factors were retained. PCR without genomic template was used as  
16 blank control. **(C):** Frequency of transgene removal in clones obtained with or without A83-  
17 01. Addition of A83-01 in 2i/Lif medium promoted the frequency of transgene-free riPS cells  
18 improved from 47% to 72%.

19

20 **Figure S3.** Additional characterization of riPS cells *in vitro* and *in vivo*. **(A):** The expression  
21 levels of endogenous pluripotency factors quantified by q-PCR. We chose 3 different  
22 transgene-free riPS cell lines for q-PCR test. The graphs showed that the endogenous *Rex1*,

23 *Eras*, *Nanog*, *Sox2* and *Oct4* of established riPS cells were activated, in comparison with rat  
24 ES cells, though with variation across different clones. Gene expression levels were  
25 normalized to expression of the house-keeping gene glyceraldehyde-3-phosphate  
26 dehydrogenase (*Gapdh*). The RNA expression of pluripotency factors in rat ES cells was set to  
27 1, rat embryonic fibroblasts were used as a negative control. Data indicates the means  $\pm$  SD  
28 of 3 independent technical repeats. **(B)**: Principal component analysis of the transcriptomes  
29 of REFs, transgene-free riPS cells (LSP-24-22, LSP-24-23, LSP-24-24), transgene-intact riPS  
30 cells (LSP-24-11, LSP-24-12, LSP-24-19) and rat ES cells (SD-Tg.EC1, DAC2, DAC8) [11, 51]. **(C)**:  
31 Embryoid bodies (EBs) derived from riPS cells and subsequent differentiated derivatives. We  
32 obtained EB formation using riPS cells (LSP-24-24, passage 25) by continuous culture in  
33 differentiation medium, which was changed every two days sequentially with serum medium  
34 supplemented with 50%, 30% and 0% 3i/Lif medium. Additional culture in serum medium for  
35 another week resulted in different cell types. Scale bar, 500  $\mu$ m. Immunofluorescence  
36 staining confirmed *in vitro* differentiated derivatives including all 3 germ layers of ectoderm  
37 (NESTIN), mesoderm (alpha smooth muscle actin,  $\alpha$ -SMA) and endoderm (GATA 4). Scale bar,  
38 50  $\mu$ m. **(D)**: Teratoma (black arrow) formed 6 weeks after injection of riPS cells (LSP-24-24,  
39 passage 30) into SCID mouse. Hematoxylin-eosin (HE) stained sections of the teratoma  
40 showed all 3 germ layer derivatives; epidermis (ectoderm), cartilage (mesoderm) and  
41 intestinal epithelium (endoderm) are indicated by arrows. Scale bar, 100  $\mu$ m. **(E)**:  
42 Representative polyploid and diploid metaphase chromosome preps of riPS cells. 2i/Lif  
43 medium derived riPS clone showed a dominant polyploid metaphase chromosome while  
44 3i/Lif medium derived riPS clone showed a dominant diploid metaphase chromosome.
